# Supplementary material for: Excess folic acid intake increases DNA de novo point mutations
Source: Cell Discov. 2023 Feb 28;9:22. doi: 10.1038/s41421-022-00512-0 (PMC9970956; doi:10.1038/s41421-022-00512-0)
Supplement: Supplementary file 1 — Supplementary Information [file 41421_2022_512_MOESM1_ESM.pdf]

## **Material and Methods**

### **Mouse Cohort Description and Dietary Intervention**

All experiments utilizing animals were approved by the Baylor College of Medicine Institutional Animal Care and Use Committee. C57BL/6J mice were obtained from The Jackson Laboratory (Bar Harbor, ME). Clifford/Koury folate deficient L-amino acid defined rodent diets (Diet # 517777) with conventional (3mg/kg, Diet # 517940), deficient (0.3mg/kg, Diet # 517796), and excess FA (30mg/kg, Diet # 517941) content with 1% succinyl sulfathiazole to inhibit FA synthesis by the intestinal flora were purchased from Dyets, Inc. (Bethlehem, PA).

#### **Female mouse treatment groups**

Virgin females 8 weeks of age were randomly assigned to receive either a control diet containing 3 mg FA/kg diet or a FA-deficient diet containing 0.3 mg FA/kg diet, or a FA-supplemented diet containing 30 mg FA/kg for four months prior to the first attempt to mate with mice which were kept on the control diet. Each time, only one of the parents was on testing diet. Female mice were continually maintained on the testing diets until the time the dams were euthanized on E12.5 to harvest embryos.

#### **Male mouse treatment groups**

Virgin males 8 weeks of age were randomly assigned to receive either a control diet containing 3 mg FA/kg diet or a FA-deficient diet containing 0.3 mg FA/kg diet, or a FA-supplemented diet containing 30 mg FA/kg for four months prior to the first attempt at mating. Embryos were harvested at E12.5 from pregnant females.

#### **Blood folate measurement**

Blood folate levels were measured using a folate competitive analysis as previously reported<sup>1</sup>. Briefly, FOLR1 (1  $\mu$ L at 50ng/ $\mu$ L) was immobilized on microtiter plates in PBS buffer (pH 8.0). The following day, unbound protein was removed by washing three times with tris-buffered saline (pH 7.6). Ligand in the form of FA is used to compete with labeled (e.g., horse radish peroxidase) folic acid (FA-HRP) for competitive binding to FOLR1. Standard dilution (1:2) of FA (6 to 0.8125ng/mL, 0ng/mL) results in FOLR1-folate binding curves.

## **Whole Genome Sequencing (WGS)**

### DNA extraction

Mouse embryos and parental tail tissues were collected and maintained at -20°C. Qiagen QIAamp DNA micro-Kit (Cat. No. 56304) was used for DNA extraction with RNase treatment. Qubit assays were performed to validate that all DNA samples met the quality requirements for following sequencing projects.

### WGS Data Processing

Extracted genomic DNA from mouse tails or embryos were subjected to WGS on an Illumina NovaSeq. WGS raw FASTQ data (sequencing projects were conducted by Admera Health, LLC) were processed using a pipeline based on GATK Best Practice. Sequence reads were mapped to the reference genome (mm10) with BWA-MEM. After sorting by Samtools, BAM files are further processed with GATK Best Practice workflows, including marking duplicates, realignment of indels, base quality recalibration, as described<sup>2</sup>. Single nucleotide variants and small indels were called with GATK haplotypeCaller.

### DNM Calling and Variant Filtering

DNMs were called by TrioDenovo program<sup>3</sup>. An in-software pipeline for filtering DNSNV was used (<https://genome.sph.umich.edu/wiki/Triodenovo>). We followed the previously well-described filtering pipeline for the DNM filtering<sup>4</sup>. The hard filters include: (i) an in-cohort MAF = 0; (ii) a minimum 20 total reads, 5 alternate allele reads, and a minimum 20% alternate allele ratio in the embryo if alternate allele reads are greater than 10. If alternate reads are less than 10, a minimum 30% ratio is required. (iii) a minimum depth of 15 reference reads and alternative allele < 3.5% in the parents. All the DNMs were annotated by VEP (Ensembl Variant Effect Predictor).

#### Quality control and validation

All the DNSNVs are then filtered from ‘Bamfile’ confirmation and filtered with a lowest genotype quality (Qual) > 50. We extracted all of the ‘Bamfile’ containing the region of each DNSNV and its surrounding 2000bp. We examined each mutation in the three lanes of ‘Bamfile’ checking process via using Integrative Genomics Viewer. The filters are (i) minimum depth of 15 reference reads and alternative allele < 3.5% in the parents; (ii) mutations in the same read are excluded if it is in the same haplotype. To estimate the true positive rate of our DNSNV dataset, we successfully sequenced 72 DNSNVs, and 70 out of 72 were confirmed by Sanger sequencing (True Positive Rate = 97.2%). Finally, we performed a validation test on our mutation calling pipeline using ‘Genome in a bottle’ as a reference. Using our pipeline, we obtained a sensitivity of  $1039 / (1039 + 5) = 0.9952107$ , and a specificity of  $(4121168 - 1044 - 1) / (4121168 - 1044) = 0.9999998$ .

### **Whole genome bisulfide sequencing**

#### WGBS data processing

Raw bisulfite sequencing data of mouse embryos is mapped to mm10 mouse reference genome by BSMAP (2.90) with default setting. The contaminated adapters and low-quality bases are removed

with the ‘-q’ and ‘-A’ parameters during alignment. We subsequently used the methratio.py script provided by BSMAP to calculate the methylation levels of CpG sites. CpG sites that are covered less than 4 reads are discarded before the downstream analysis.

#### *De novo* differentially methylated regions (DMRs) and DNA methylation canyon calling

We identify *de novo* DMRs between two conditions with the ‘*de novo*’ mode of Metilene (0.2-7)<sup>5</sup>. DMRs with mean methylation change greater than 0.2 and q value less than 0.05 are selected for downstream analysis. The identified DMRs are annotated to the nearest gene. KEGG pathway enrichment and gene ontology analyses were performed by using DAVID. For DNA methylation canyon identification, we used the method described by Mira Jeong<sup>6</sup>. Boxplots were used to depict the mean methylation level of the gene regions for FA-deficient, normal, and FA-high groups. The horizontal line of the box refers to the 25th percentiles, median and 75th percentiles, respectively. Whiskers represents the 1.5X interquartile range. Student’s t-test was performed to compare the mean methylation level of gene regions for different FA treatment groups.

#### **Western blotting**

Proteins were extracted from NE-4C cells cultured for 72 h in FA control (0.5μM) or FA high (5μM) medium. Antibodies: anti-MTHFR (1:1000, Cat#: ab203786, Abcam, Cambridge, MA, USA), anti-GAPDH (Cat#:5174S, Cell Signaling Technology, Inc, Danvers, MA), anti-H3K36me3 (1:1000, Cat #9763, CST, MA, USA), Anti-Histone H3 (1:10000, ab18521, Abcam, Cambridge, MA, USA) were used. GAPDH and H3 were references for MTHFR and H3K36me3 relative calculation respectively.

#### **Reverse transcription-quantitative polymerase chain reaction (RT-qPCR)**

mRNA was extracted from mice embryos using quick-RNA Tissue/Insect Kit (Cat#:R2030, Zymo Research, Irvine, CA, USA). RNA quantification was measured using Nanodrop 200. RT-qPCR was performed with One Step TB Green PrimerScript RT-PCR kit II (Perfect Real Time) from TakaRa (Cat#RR086A) following the product instruction. PCR was performed on a Bio-Rad CFX96 Optics Module qPCR/RT PCR Thermal Cycler. Primers used were as following:

Lig4rtF:CTAGCTACCTGGGACCTGCG;                      Lig4rtR:GCAAAGGGGACATGAGCTGC;  
Ubr5rtF:GCTATTGCGGTCAGGGAGC;                      Ubr5rtR:CATGGTGATGGGACGGCC;  
AtmrtF:AGGCATTCTGATTCCAAACAAGG;                      AtmrtR:TCTGGAGCTCTGTGTGGTGG;  
GapdhrtF:CTTCTTGTGCAGTGCCAGCC; GapdhrtR:TGAAGGGGTCGTTGATGGCA.

### Statistical analysis

Differences in DNSNV counts among groups were examined with Wilcoxon signed-rank test or Student's t-test. Fisher's exact test was used to examine the enrichment among different groups. Statistical analyses were conducted using R Studio 3.5.2. A two-tailed *P*-value of <0.05 was considered statistical significance. *P*-adj values were all calculated by FDR correction.

### Data access

The raw sequencing data that support the findings of this study were submitted to NIH SRA database (BioProject ID: PRJNA793863 for WGS data and PRJNA791955 for WGBS data).

### References:

- 1 Cabrera RM, Souder JP, Steele JW *et al.* The antagonism of folate receptor by dolutegravir: developmental toxicity reduction by supplemental folic acid. *AIDS* 2019; **33**:1967-1976.
- 2 McKenna A, Hanna M, Banks E *et al.* The Genome Analysis Toolkit: a MapReduce framework for analyzing next-generation DNA sequencing data. *Genome Res* 2010; **20**:1297-1303.
- 3 Wei Q, Zhan X, Zhong X *et al.* A Bayesian framework for de novo mutation calling in parents-offspring trios. *Bioinformatics* 2015; **31**:1375-1381.

- 4 Jin SC, Homsy J, Zaidi S *et al.* Contribution of rare inherited and de novo variants in 2,871 congenital heart disease probands. *Nat Genet* 2017; **49**:1593-1601.
- 5 Jühling F, Kretzmer H, Bernhart SH, Otto C, Stadler PF, Hoffmann S. metilene: fast and sensitive calling of differentially methylated regions from bisulfite sequencing data. *Genome Res* 2016; **26**:256-262.
- 6 Jeong M, Sun D, Luo M *et al.* Large conserved domains of low DNA methylation maintained by Dnmt3a. *Nature genetics* 2014; **46**:17.

## Supplementary Figure Legends

**Supplementary Fig. S1| Blood folate concentrations.** Blood folate measurement showed maternal FA deficient diet decreased the blood folate level, while FA high diet increased the blood folate level significantly. One-way ANOVA with Dunnett's multiple comparisons was performed to examine whether the differences are significant.

**Supplementary Fig. S2| Overall characterization of DNM distribution and location.** a, Chromosome size and DNSNV distribution. Linear Regression p-value < 0.0001. Unit = base pair (bp) b, Genome-wide rainfall plot of DNSNVs of each FA-treated group. d, VEP annotation of DNSNVs from different FA treatment in mm10 genome.

**Supplementary Fig. S3 MTHFR and H3K36Me3 relative protein expression in NE4C cells cultured in FA-control and FA-high medium.** a, immunoblotting detection of MTHFR, GAPDH, H3K36Me3, and histone H3. b, GAPDH relative amount quantification using GAPDH as reference. c, H3K36Me3 relative amount quantification using histone H3 as reference.

**Supplementary Fig. S4| Pathway enrichment of hypomethylated DMRs in FA-deficient group.** Both KEGG and Gene Ontology Biological Process pathways are displayed.

**Supplementary Fig. S5| Pathway enrichment of hypermethylated DMRs in FA-high group.** Both KEGG and Gene Ontology Biological Process pathways are displayed. Pathway enrichment of hypomethylated DMRs in FA-high group was also shown at the right panel.

Supplementary Fig. S1

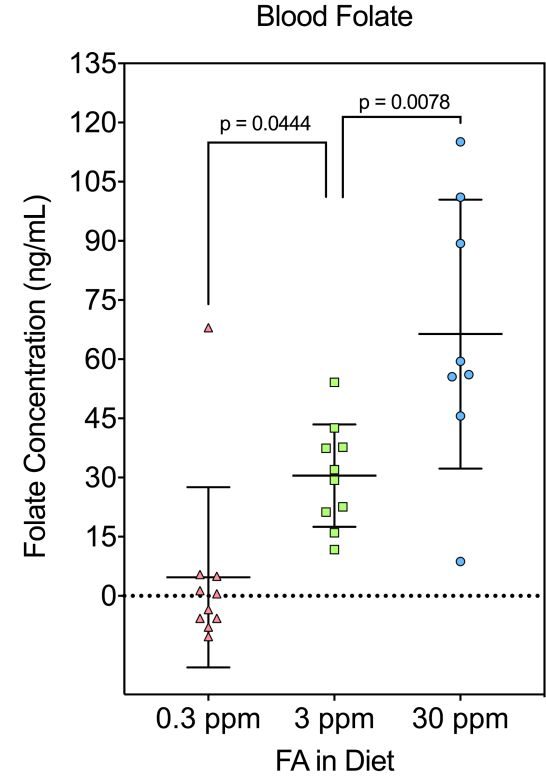

Supplementary Fig. S2

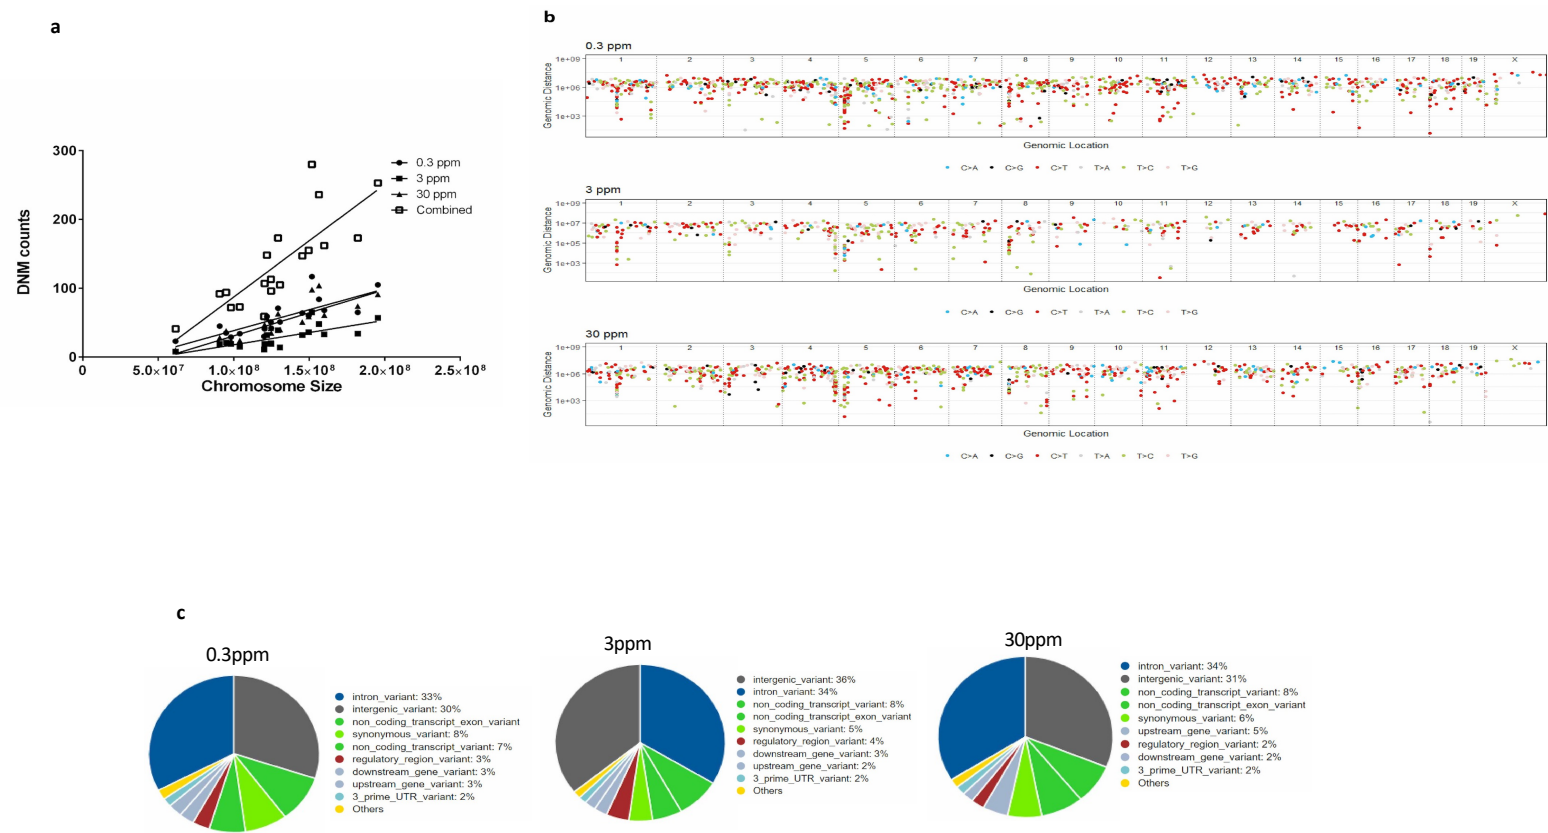

Supplementary Fig. S3

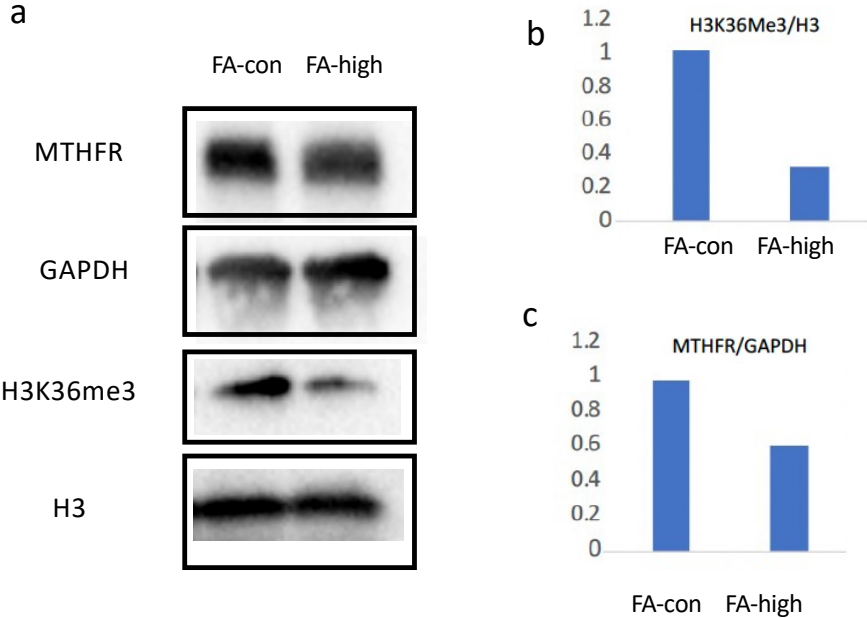

Supplementary Fig. S4

Pathway enrichment of hypermethylated DMRs in FA-high group

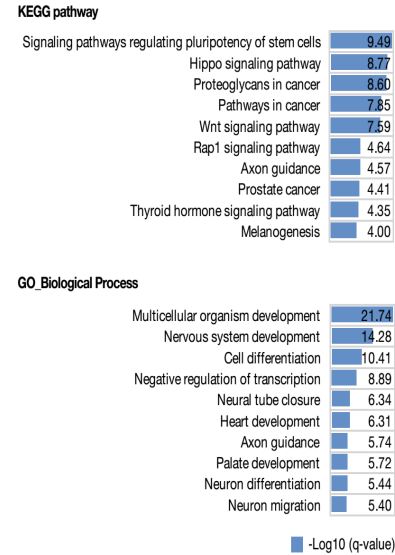

Pathway enrichment of hypomethylated DMRs in FA-high group

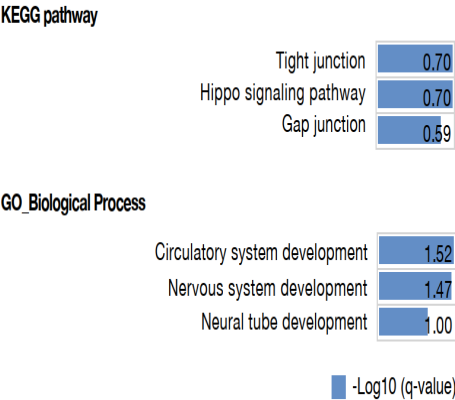

Supplementary Fig. S5

### Pathway enrichment of hypomethylated DMRs in FA-low group

#### KEGG pathway

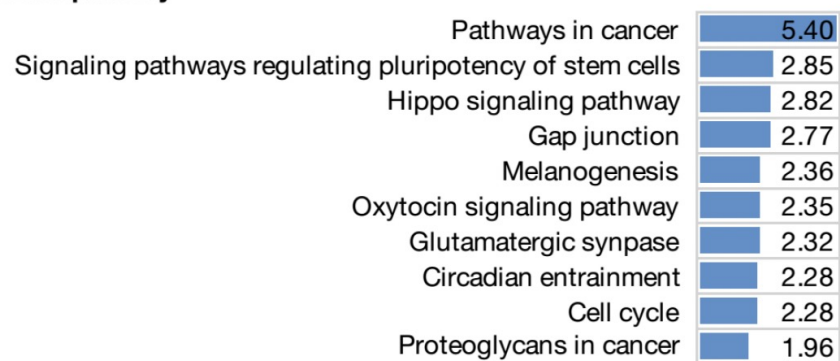

#### GO\_Biological Process

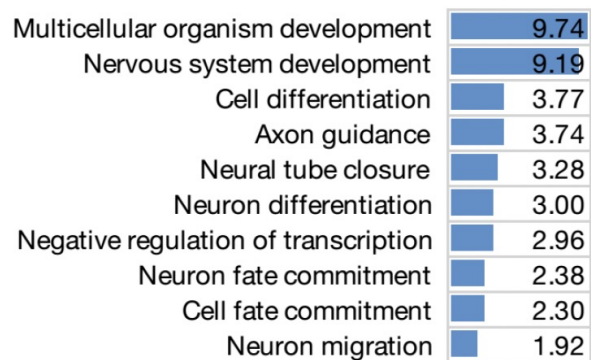

■ -Log10 (q-value)

Supplement Table S1. 58 DNA repair genes with hypermethylated DMRs in the promoter

| Chr   | Start     | End       | meth  | diff     | q_value                     | Annotation                  | Detailed Annotation | Distance to TSS | Nearest PromoterID | Entrez ID | Gene Name                                                              | Gene Description | Gene Type | gene |
|-------|-----------|-----------|-------|----------|-----------------------------|-----------------------------|---------------------|-----------------|--------------------|-----------|------------------------------------------------------------------------|------------------|-----------|------|
| chr1  | 191574849 | 191575040 | 0.245 | 0.00031  | promoter-TSS (NM_001306203) | promoter-TSS (NM_001306204) | 599                 | NM_00105233     | 76843              | Dtl       | Dentless Homolog (Drosophila)                                          | protein-coding   | DTL       |      |
| chr10 | 11149374  | 11149484  | 0.562 | 0.00018  | promoter-TSS (NM_172937)    | promoter-TSS (NM_001077707) | -1                  | NM_001077707    | 268281             | Shprh     | SWI2 histone linker PHD RING helicase                                  | protein-coding   | SHPRH     |      |
| chr10 | 81378275  | 81378347  | 0.205 | 0.00036  | promoter-TSS (NM_019757)    | promoter-TSS (NM_019757)    | 59                  | NM_019757       | 56371              | Fxr1      | fizzy/cell division cycle 20 related 1 (Drosophila)                    | protein-coding   | FZR1      |      |
| chr11 | 4637689   | 4637835   | 0.280 | 0.024    | promoter-TSS (NM_029291)    | promoter-TSS (NM_029291)    | -31                 | NM_029291       | 75452              | Ascc2     | activating signal cointegrator 1 complex subunit 2                     | protein-coding   | ASCC2     |      |
| chr11 | 5878084   | 5878242   | 0.293 | 0.00003  | promoter-TSS (NM_008894)    | promoter-TSS (NM_008894)    | 93                  | NM_008894       | 18972              | Pold2     | polymerase (DNA directed), delta 2, regulatory subunit                 | protein-coding   | POLD2     |      |
| chr11 | 26386293  | 26387370  | 0.214 | 0.01     | promoter-TSS (NR_102382)    | promoter-TSS (NM_025923)    | -252                | NM_025923       | 67030              | Fanc1     | Fanconi anemia, complementation group I                                | protein-coding   | FANCL     |      |
| chr11 | 77607912  | 77608152  | 0.287 | 6.4E-18  | promoter-TSS (NM_144825)    | promoter-TSS (NM_144825)    | -217                | NM_144825       | 216965             | Tao1      | TAO kinase 1                                                           | protein-coding   | TAD1      |      |
| chr11 | 106779472 | 106779631 | 0.569 | 0.000016 | promoter-TSS (NM_027785)    | promoter-TSS (NM_027785)    | -15                 | NM_027785       | 50776              | Pold2     | polymerase (DNA directed), gamma 2, accessory subunit                  | protein-coding   | POLD2     |      |
| chr11 | 119041189 | 119041305 | 0.233 | 0.0064   | promoter-TSS (NM_013926)    | promoter-TSS (NM_013926)    | -334                | NM_013926       | 30951              | Cbx8      | chromobox 8                                                            | protein-coding   | CBX8      |      |
| chr11 | 119491356 | 119491476 | 0.229 | 1.4E-07  | promoter-TSS (NM_177394)    | promoter-TSS (NM_177394)    | 69                  | NM_001164636    | 338371             | Endov     | endonuclease V                                                         | protein-coding   | ENDOV     |      |
| chr12 | 11265953  | 11266028  | 0.307 | 0.00066  | promoter-TSS (NM_177331)    | promoter-TSS (NM_177331)    | 105                 | NM_025695       | 67241              | Smc6      | structural maintenance of chromosomes 6                                | protein-coding   | SMC6      |      |
| chr12 | 110888600 | 110888852 | 0.210 | 0.0063   | promoter-TSS (NM_175336)    | promoter-TSS (NM_175336)    | 419                 | NM_027223       | 67236              | Cinp      | cyclin-dependent kinase 2 interacting protein                          | protein-coding   | CINP      |      |
| chr12 | 111813613 | 111813729 | 0.218 | 0.028    | promoter-TSS (NM_026752)    | promoter-TSS (NM_026752)    | 170                 | NM_028875       | 74335              | Xrcc3     | X-ray repair complementing defective repair in Chinese hamster cells 3 | protein-coding   | XRCC3     |      |
| chr13 | 32801696  | 32801858  | 0.280 | 0.000016 | promoter-TSS (NM_030215)    | promoter-TSS (NM_030215)    | -253                | NM_030215       | 78903              | Wrip1     | Wiener helicase-interacting protein 1                                  | protein-coding   | WRNIP1    |      |
| chr13 | 47106392  | 47106497  | 0.405 | 0.000032 | promoter-TSS (NM_025900)    | promoter-TSS (NM_025900)    | -224                | NM_025900       | 110052             | Dek       | DEK oncogene (DNA binding)                                             | protein-coding   | DEK       |      |
| chr13 | 63431597  | 63431732  | 0.295 | 9E-09    | promoter-TSS (NM_001042673) | promoter-TSS (NM_001042673) | 80                  | NM_007985       | 14088              | Fancp     | Fanconi anemia, complementation group C                                | protein-coding   | FANCC     |      |
| chr13 | 92355035  | 92355135  | 0.414 | 0.0001   | promoter-TSS (NM_010829)    | promoter-TSS (NM_010829)    | -82                 | NM_010829       | 17686              | Msh3      | mutS homolog 3 (E. coli)                                               | protein-coding   | MSH3      |      |
| chr14 | 16364697  | 16365045  | 0.269 | 0.0076   | promoter-TSS (NM_009409)    | promoter-TSS (NM_009409)    | -335                | NM_009409       | 21974              | Top2b     | topoisomerase (DNA) II beta                                            | protein-coding   | TOP2B     |      |
| chr14 | 32202276  | 32202429  | 0.278 | 1.1E-08  | promoter-TSS (NM_016897)    | promoter-TSS (NM_016897)    | 382                 | NM_011960       | 26430              | Parg      | poly (ADP-ribose) glycohydrolase                                       | protein-coding   | PARG      |      |
| chr14 | 52197190  | 52197584  | 0.223 | 1E-16    | promoter-TSS (NM_033618)    | promoter-TSS (NM_033618)    | -148                | NM_033618       | 114741             | Supt16    | suppressor of Ty 16                                                    | protein-coding   | SUP16     |      |
| chr14 | 63193795  | 63194047  | 0.262 | 0.00012  | promoter-TSS (NM_201610)    | promoter-TSS (NM_201610)    | -396                | NM_201610       | 382913             | Neil2     | nei like 2 (E. coli)                                                   | protein-coding   | NEIL2     |      |
| chr15 | 38078952  | 38079021  | 0.457 | 0.00025  | promoter-TSS (NM_001081359) | promoter-TSS (NM_001112721) | -133                | NM_001081359    | 70790              | Ubr5      | ubiquitin protein ligase E3 component n-recognin 5                     | protein-coding   | UBR5      |      |
| chr15 | 51991754  | 51991932  | 0.319 | 2.9E-06  | promoter-TSS (NM_009009)    | promoter-TSS (NM_009009)    | -83                 | NM_009009       | 19357              | Rad21     | RAD21 homolog (S. pombe)                                               | protein-coding   | RAD21     |      |
| chr15 | 76478108  | 76478325  | 0.237 | 0.0028   | promoter-TSS (NM_013481)    | promoter-TSS (NM_013481)    | 772                 | NM_008296       | 15499              | Hsf1      | heat shock factor 1                                                    | protein-coding   | HSF1      |      |
| chr16 | 15637198  | 15637429  | 0.214 | 2.3E-09  | promoter-TSS (NM_011159)    | promoter-TSS (NM_011159)    | 86                  | NM_008565       | 17217              | Mcm4      | minichromosome maintenance deficient 4 homolog (S. cerevisiae)         | protein-coding   | MCM4      |      |
| chr17 | 27555937  | 27556185  | 0.222 | 2.1E-12  | promoter-TSS (NM_001166544) | promoter-TSS (NM_001039356) | -513                | NM_001166536    | 15361              | Hmgal1    | high mobility group AT-hook 1                                          | protein-coding   | HMGAL1    |      |
| chr17 | 29614768  | 29614853  | 0.204 | 0.0013   | promoter-TSS (NR_132314)    | promoter-TSS (NR_132314)    | 22                  | NM_021419       | 58230              | Rnf8      | ring finger protein 8                                                  | protein-coding   | RNF8      |      |
| chr17 | 35821008  | 35821709  | 0.218 | 7.4E-08  | promoter-TSS (NM_133662)    | promoter-TSS (NM_133662)    | -354                | NM_133662       | 15937              | Ier3      | immediate early response 3                                             | protein-coding   | IER3      |      |
| chr18 | 21001695  | 21001985  | 0.264 | 3.2E-08  | promoter-TSS (NM_001303011) | promoter-TSS (NM_001303011) | -117                | NM_001303011    | 56515              | Rnf138    | ring finger protein 138                                                | protein-coding   | RNF138    |      |
| chr19 | 5609590   | 5609755   | 0.213 | 0.000085 | promoter-TSS (NR_037603)    | promoter-TSS (NR_037603)    | 34                  | NR_037603       | 81601              | Kat5      | K(lysine) acetyltransferase 5                                          | protein-coding   | KAT5      |      |
| chr19 | 7206127   | 7206314   | 0.409 | 9.8E-08  | promoter-TSS (NM_134150)    | promoter-TSS (NM_134150)    | 63                  | NM_134150       | 107260             | Otub1     | OTU domain, ubiquitin aldehyde binding 1                               | protein-coding   | OTUB1     |      |
| chr19 | 10203879  | 10203952  | 0.277 | 0.000014 | promoter-TSS (NM_007999)    | promoter-TSS (NM_007999)    | 27                  | NM_007999       | 14156              | Fen1      | flap structure specific endonuclease 1                                 | protein-coding   | FEN1      |      |
| chr19 | 10605446  | 10605677  | 0.246 | 4.7E-10  | promoter-TSS (NM_015735)    | promoter-TSS (NM_015735)    | -63                 | NM_015735       | 13194              | Odb1      | damage-specific DNA-binding protein 1                                  | protein-coding   | DOB1      |      |
| chr2  | 49451039  | 49451162  | 0.220 | 4.6E-10  | promoter-TSS (NM_172663)    | promoter-TSS (NM_172663)    | -385                | NM_172663       | 227867             | Epc2      | enhancer of polycomb homolog 2 (Drosophila)                            | protein-coding   | EPC2      |      |
| chr2  | 119477703 | 119477782 | 0.240 | 0.00023  | promoter-TSS (NM_026574)    | promoter-TSS (NM_026574)    | -114                | NM_026574       | 68142              | Ino80     | INO80 homolog (S. cerevisiae)                                          | protein-coding   | INO80     |      |
| chr2  | 144270861 | 144270986 | 0.235 | 0.0071   | promoter-TSS (NM_001199188) | promoter-TSS (NM_001289631) | 20                  | NM_001289630    | 74528              | Mgme1     | mitochondrial genome maintenance exonuclease 1                         | protein-coding   | MGME1     |      |
| chr2  | 147013052 | 147013155 | 0.293 | 0.0018   | promoter-TSS (NM_011917)    | promoter-TSS (NM_011917)    | 44                  | NM_011917       | 24128              | Xrn2      | 5'-3' exoribonuclease 2                                                | protein-coding   | XRN2      |      |
| chr2  | 167632073 | 167632271 | 0.376 | 3.2E-12  | promoter-TSS (NM_023230)    | promoter-TSS (NM_023230)    | -167                | NM_023230       | 66589              | Ube2v1    | ubiquitin-conjugating enzyme E2 variant 1                              | protein-coding   | UBE2V1    |      |
| chr3  | 90433519  | 90433571  | 0.214 | 0.0029   | promoter-TSS (NM_178876)    | promoter-TSS (NM_178876)    | 91                  | NM_145540       | 229543             | Int3      | integrator complex subunit 3                                           | protein-coding   | INT3      |      |
| chr3  | 135438685 | 135439016 | 0.276 | 2.2E-09  | promoter-TSS (NM_025356)    | promoter-TSS (NM_025356)    | 92                  | NM_025356       | 66105              | Ube2d3    | ubiquitin-conjugating enzyme E2D 3                                     | protein-coding   | UBE2D3    |      |
| chr4  | 21776022  | 21776570  | 0.208 | 5.5E-11  | promoter-TSS (NM_001290425) | promoter-TSS (NM_001290425) | 26                  | NM_152825       | 77593              | Usp45     | ubiquitin specific peptidase 45                                        | protein-coding   | USP45     |      |
| chr4  | 120924849 | 120925116 | 0.250 | 0.048    | promoter-TSS (NM_001160043) | promoter-TSS (NM_028457)    | 22                  | NM_028457       | 73172              | Exo5      | exonuclease 5                                                          | protein-coding   | EXO5      |      |
| chr4  | 132639019 | 132639084 | 0.410 | 0.000088 | promoter-TSS (NM_010166)    | promoter-TSS (NM_010166)    | 6                   | NM_010166       | 14050              | Eya3      | eyes absent 3 homolog (Drosophila)                                     | protein-coding   | EYA3      |      |
| chr5  | 33378516  | 33378563  | 0.317 | 0.000017 | promoter-TSS (NM_001081101) | promoter-TSS (NM_001081101) | -156                | NM_001081101    | 71101              | Uvsa      | UV stimulated scaffold protein A                                       | protein-coding   | UVSSA     |      |
| chr5  | 65335710  | 65335798  | 0.314 | 0.0016   | promoter-TSS (NM_011258)    | promoter-TSS (NM_011258)    | -115                | NM_011258       | 19687              | Rfc1      | replication factor C (activator 1) 1                                   | protein-coding   | RFC1      |      |
| chr5  | 114128110 | 114128499 | 0.258 | 1.5E-10  | promoter-TSS (NM_175016)    | promoter-TSS (NM_175016)    | -129                | NM_175016       | 231642             | Alkbh2    | alkB, alkylation repair homolog 2 (E. coli)                            | protein-coding   | ALKBH2    |      |
| chr5  | 144768725 | 144768858 | 0.292 | 1.7E-08  | promoter-TSS (NM_001081362) | promoter-TSS (NM_001081362) | 0                   | NM_001081362    | 100683             | Trrap     | transformation/transcription domain-associated protein                 | protein-coding   | TRRAP     |      |
| chr6  | 88898667  | 88898735  | 0.341 | 0.014    | promoter-TSS (NM_008564)    | promoter-TSS (NM_008564)    | 79                  | NM_008564       | 17216              | Mcm2      | minichromosome maintenance deficient 2 mitotin (S. cerevisiae)         | protein-coding   | MCM2      |      |
| chr6  | 91473046  | 91473178  | 0.326 | 0.012    | promoter-TSS (NM_028766)    | promoter-TSS (NM_028766)    | 311                 | NM_133928       | 72170              | Chchd4    | coiled-coil-helix-coiled-coil-helix domain containing 4                | protein-coding   | CHCHD4    |      |
| chr7  | 19345006  | 19345284  | 0.323 | 0.04     | promoter-TSS (NM_007948)    | promoter-TSS (NM_001127324) | 74                  | NM_007948       | 13870              | Erc1      | excision repair cross-complementing rodent repair deficiency, complem  | protein-coding   | ERCC1     |      |
| chr7  | 19381859  | 19381977  | 0.217 | 0.000082 | promoter-TSS (NM_007949)    | promoter-TSS (NM_007949)    | -121                | NM_007949       | 13871              | Erc2      | excision repair cross-complementing rodent repair deficiency, complem  | protein-coding   | ERCC2     |      |
| chr7  | 51862284  | 51862560  | 0.394 | 1.9E-09  | promoter-TSS (NM_001115087) | promoter-TSS (NM_001115087) | -155                | NM_001115087    | 10004608           | Fancf     | Fanconi anemia, complementation group F                                | protein-coding   | FANCF     |      |
| chr7  | 126695373 | 126695539 | 0.252 | 1.1E-07  | promoter-TSS (NM_175103)    | promoter-TSS (NM_175103)    | 327                 | NM_029420       | 75764              | Slx1b     | SLX1 structure-specific endonuclease subunit homolog B (S. cerevisiae) | protein-coding   | SLX1B     |      |
| chr8  | 9976410   | 9976521   | 0.248 | 2.7E-06  | promoter-TSS (NM_176953)    | promoter-TSS (NM_176953)    | -143                | NM_176953       | 319583             | Lig4      | ligase IV, DNA, ATP-dependent                                          | protein-coding   | LIG4      |      |
| chr8  | 22653353  | 22653504  | 0.414 | 4.2E-07  | promoter-TSS (NM_011130)    | promoter-TSS (NM_011130)    | 8                   | NM_011130       | 18970              | Polb      | polymerase (DNA directed), beta                                        | protein-coding   | POLB      |      |
| chr9  | 31386174  | 31386307  | 0.438 | 2.6E-06  | promoter-TSS (NM_172766)    | promoter-TSS (NM_172766)    | 49                  | NM_172766       | 235134             | Nrkb      | nuclear factor related to kappa B binding protein                      | protein-coding   | NFRKB     |      |
| chr9  | 44305828  | 44305941  | 0.307 | 0.000094 | promoter-TSS (NM_172162)    | promoter-TSS (NM_172162)    | -214                | NM_172162       | 102423             | Hnfp      | histone H4 transcription factor                                        | protein-coding   | HINFP     |      |
| chr9  | 53536725  | 53536945  | 0.233 | 9.4E-06  | promoter-TSS (NM_001081152) | promoter-TSS (NM_001081152) | -164                | NM_007499       | 11920              | Atm       | ataxia telangiectasia mutated                                          | protein-coding   | ATM       |      |
